# Supplementary figures and images for: Novel SPEF2 Variant in a Japanese Patient with Primary Ciliary Dyskinesia: A Case Report and Literature Review
Source: MDPI journal article supplement (doi:10.3390/jcm12010317), 2022-12-31

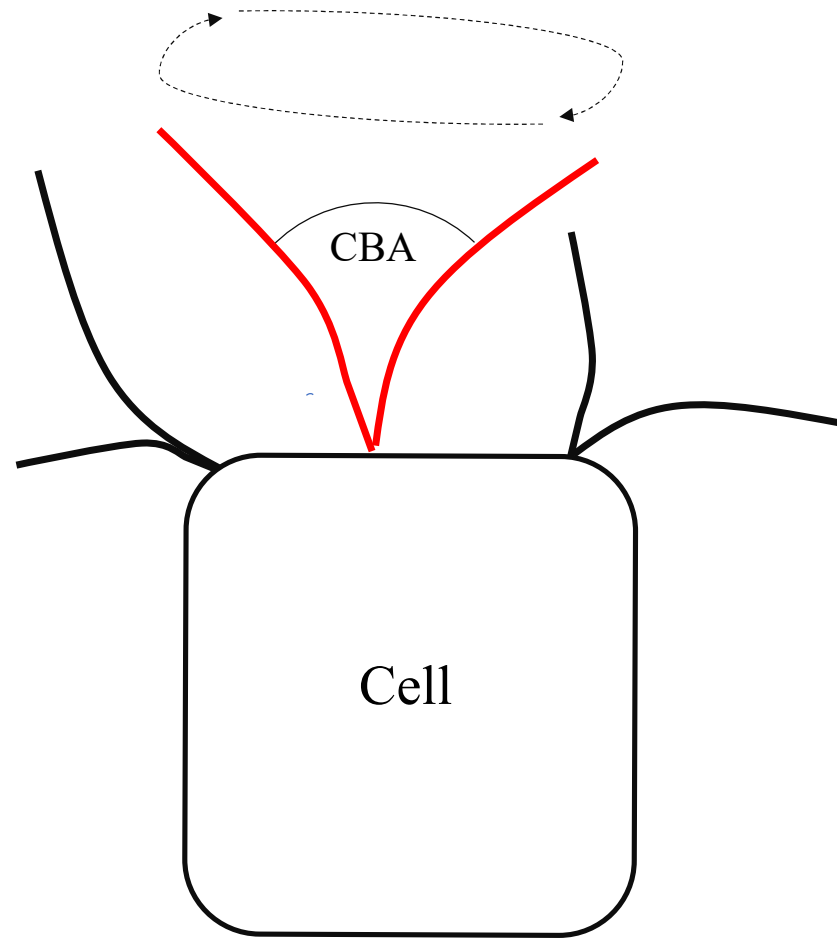

Figure S1: Image of measuring CBA.

Supplement: s1 [file s1]
